# Supplementary material
Source: HighWire-hosted journal article supplement (https://bjsm.bmj.com/content/bjsports-2019-101206)
Supplement: inline-supplementary-material-1 [file inline-supplementary-material-1.pdf]

## SUPPLEMENTARY FILES

### SUPPLEMENTARY FILE 1: SEARCH TERMS, STRATEGIES, AND RESULTS

#### SEARCH TERMS AND STRATEGIES

1. Population: Sport Injury
2. Injury Type: Lower body Musculoskeletal injury
3. Concept: Non-Physical Needs
4. Limits and exclusions

#### a) Search Strategy for Medline

Database: Medline via OVID <1946 to Present  
 (Ovid MEDLINE(R) In-Process & Other Non-Indexed Citations, Ovid MEDLINE(R) Daily and Ovid MEDLINE(R) 1946 to Present)  
 Search mode: Medical subject headings (MeSH)  
 Date Searched: May 28, 2018

Limits: English Language

Results: 2088, After duplicates removed: 2063

#### Search Strategy for MEDLINE (Ovid)

| No. | Searches                                                                                                                                                                                                                                                                                                                                                                   |
|-----|----------------------------------------------------------------------------------------------------------------------------------------------------------------------------------------------------------------------------------------------------------------------------------------------------------------------------------------------------------------------------|
| 1   | Athletic Injuries/                                                                                                                                                                                                                                                                                                                                                         |
| 2   | (Athlet* injur* or sport* injur* or recreation* injur*).mp.                                                                                                                                                                                                                                                                                                                |
| 3   | 1 or 2                                                                                                                                                                                                                                                                                                                                                                     |
| 4   | "Sprains and Strains"/                                                                                                                                                                                                                                                                                                                                                     |
| 5   | (tear* or rupture* or ligament* or sprain* or strain* or dislocation*).mp.                                                                                                                                                                                                                                                                                                 |
| 6   | 4 or 5                                                                                                                                                                                                                                                                                                                                                                     |
| 7   | foot joints/ or hip joint/ or knee joint/<br>(lower extremit* or lower limb* or hip* or thigh* or leg* or knee* or ankle* or foot or feet or toe* or ((anterior or posterior) adj cruciate adj2 ligament*) or ((medial or lateral) adj collateral adj2 ligament*) or femoracetabular or femur                                                                              |
| 8   | or menisc* or patellofemoral).mp. [mp=title, abstract, original title, name of substance word, subject heading word, keyword heading word, protocol supplementary concept word, rare disease supplementary concept word, unique identifier, synonyms]                                                                                                                      |
| 9   | 7 or 8                                                                                                                                                                                                                                                                                                                                                                     |
| 10  | hip injuries/ or hip dislocation/ or leg injuries/ or ankle injuries/ or foot injuries/ or knee injuries/ or medial tibial stress syndrome/ or tibial meniscus injuries/                                                                                                                                                                                                   |
| 11  | hip dislocation/ or knee dislocation/ or patellar dislocation/                                                                                                                                                                                                                                                                                                             |
| 12  | 6 and 9                                                                                                                                                                                                                                                                                                                                                                    |
| 13  | 10 or 11 or 12                                                                                                                                                                                                                                                                                                                                                             |
| 14  | Psychology, Sports/                                                                                                                                                                                                                                                                                                                                                        |
| 15  | adaptation, psychological/ or attitude/ or behavior/ or emotions/ or motivation/ or personality/ or psychology, social/                                                                                                                                                                                                                                                    |
| 16  | social environment/ or community networks/ or social support/<br>(psycholog* or psychosocial or psycholog* response or psycholog* readiness or social support).mp. [mp=title, abstract,                                                                                                                                                                                    |
| 17  | original title, name of substance word, subject heading word, keyword heading word, protocol supplementary concept word, rare disease supplementary concept word, unique identifier, synonyms]                                                                                                                                                                             |
| 18  | (cognition* or affect or behav* or motiv* or emotion* or patient belief* or confiden* or attitude* or personalit* or self esteem or locus of control or self efficacy or autonomy or kinesiphob* or fear* of reinjur* or avoidance or anxiet* or frustrat* or coping or cope or stress* or optimism or quality of life or patient satisfaction or goal setting or goal* or |

expectation\* or perception\* or patient prefer\* or athlet\* identit\* or wellbeing or mindfulness or resilienc\* or catastroph\* or accept\* or compassion\* or hope or achiev\* or education or knowledge or relationship\* or interaction\* or alliance\* or feedback or encourag\* or trust or communicat\* or rapport or respect or caring or connection or socioeconomic status or cultural or ethnicity or urban rural).mp. [mp=title, abstract, original title, name of substance word, subject heading word, keyword heading word, protocol supplementary concept word, rare disease supplementary concept word, unique identifier, synonyms]

19 14 or 15 or 16 or 17 or 18

20 3 and 13 and 19

21 limit 20 to english language

#### b) Search Strategy for PsycINFO

Database: PsycINFO®

Search mode: Medical subject headings (MeSH)

Date Searched: May 28, 2018

Limits: English Language

Results: 155, After duplicates removed: 131

#### Search Strategy for PsychINFO

| No. | Searches                                                                                                                                                                                                                                                                                                                                                                                                                                                                                                 |
|-----|----------------------------------------------------------------------------------------------------------------------------------------------------------------------------------------------------------------------------------------------------------------------------------------------------------------------------------------------------------------------------------------------------------------------------------------------------------------------------------------------------------|
| 1   | injuries/                                                                                                                                                                                                                                                                                                                                                                                                                                                                                                |
| 2   | (Athlet* injur* or sport* injur* or recreation* injur*).mp.                                                                                                                                                                                                                                                                                                                                                                                                                                              |
| 3   | sports/                                                                                                                                                                                                                                                                                                                                                                                                                                                                                                  |
| 4   | 1 or 2 or 3                                                                                                                                                                                                                                                                                                                                                                                                                                                                                              |
| 5   | musculoskeletal system/                                                                                                                                                                                                                                                                                                                                                                                                                                                                                  |
| 6   | (tear* or rupture* or ligament* or sprain* or strain* or dislocation*).mp.                                                                                                                                                                                                                                                                                                                                                                                                                               |
| 7   | 5 or 6                                                                                                                                                                                                                                                                                                                                                                                                                                                                                                   |
| 8   | Ankle/ or knee/                                                                                                                                                                                                                                                                                                                                                                                                                                                                                          |
| 9   | "feet (anatomy)"/ or hips/ or "leg (anatomy)"/<br>(lower extremit* or lower limb* or hip* or thigh* or leg* or knee* or ankle* or foot or feet or toe* or ((anterior or posterior) adj cruciate adj2 ligament*) or ((medial or lateral) adj collateral adj2 ligament*) or femoracetabular or femur or menisc* or patellofemoral).mp.                                                                                                                                                                     |
| 10  | 8 or 9 or 10                                                                                                                                                                                                                                                                                                                                                                                                                                                                                             |
| 11  | 7 and 11                                                                                                                                                                                                                                                                                                                                                                                                                                                                                                 |
| 12  | psychological needs/                                                                                                                                                                                                                                                                                                                                                                                                                                                                                     |
| 13  | sport psychology/ or sports medicine/                                                                                                                                                                                                                                                                                                                                                                                                                                                                    |
| 14  | psychosocial factors/                                                                                                                                                                                                                                                                                                                                                                                                                                                                                    |
| 15  | social support/                                                                                                                                                                                                                                                                                                                                                                                                                                                                                          |
| 16  | (psycholog* or psychosocial or psycholog* response or psycholog* adaptation or psycholog* readiness or social support).mp.<br>(cognition* or affect or behav* or motiv* or emotion* or patient belief* or confiden* or attitude* or personalit* or self esteem or locus of control or self efficacy or autonomy or kinesiphob* or fear* of reinjur* or avoidance or anxiet* or frustrat* or coping or cope or stress* or optimism or quality of life or patient satisfaction or goal setting or goal* or |
| 17  | expectation* or perception* or patient prefer* or athlet* identit* or wellbeing or mindfulness or resilienc* or catastroph* or accept* or compassion* or hope or achiev* or education or knowledge or relationship* or interaction* or alliance* or feedback or encourag* or trust or communicat* or rapport or respect or caring or connection or socioeconomic status or cultural or ethnicity or urban rural).mp.                                                                                     |
| 18  |                                                                                                                                                                                                                                                                                                                                                                                                                                                                                                          |

- 
- 19 13 or 14 or 15 or 16 or 17 or 18  
 20 4 and 12 and 19  
 21 limit 20 to english language
- 

c) Search Strategy for CINAHL Plus with Full Text

Database: CINAHL® Plus with Full Text

Search mode: Boolean/Phrase

Date Searched: May 28, 2018

Limits: English Language

Results: 1917, After duplicates removed: 1256

Search Strategy for CINAHL

| No. | Searches                                                                                                                                                                                                                                                                                                                                                                                                                                                                                                                                                                                                                                                                                                                                                                                                                                                                                                                                             |
|-----|------------------------------------------------------------------------------------------------------------------------------------------------------------------------------------------------------------------------------------------------------------------------------------------------------------------------------------------------------------------------------------------------------------------------------------------------------------------------------------------------------------------------------------------------------------------------------------------------------------------------------------------------------------------------------------------------------------------------------------------------------------------------------------------------------------------------------------------------------------------------------------------------------------------------------------------------------|
| 1   | (MH "Athletic Injuries+")                                                                                                                                                                                                                                                                                                                                                                                                                                                                                                                                                                                                                                                                                                                                                                                                                                                                                                                            |
| 2   | Athlet* injur*" OR "sport* injur*" or "recreation* injur*"                                                                                                                                                                                                                                                                                                                                                                                                                                                                                                                                                                                                                                                                                                                                                                                                                                                                                           |
| 3   | S1 OR S2                                                                                                                                                                                                                                                                                                                                                                                                                                                                                                                                                                                                                                                                                                                                                                                                                                                                                                                                             |
| 4   | (MH "Soft Tissue Injuries+") OR (MH "Sprains and Strains+") OR (MH "Rupture+") OR (MH "Ligament Injuries+") OR (MH "Dislocations+") OR (MH "Tears and Lacerations+                                                                                                                                                                                                                                                                                                                                                                                                                                                                                                                                                                                                                                                                                                                                                                                   |
| 5   | tear* or rupture* or ligament* or sprain* or strain* or dislocation*                                                                                                                                                                                                                                                                                                                                                                                                                                                                                                                                                                                                                                                                                                                                                                                                                                                                                 |
| 6   | S4 OR S5                                                                                                                                                                                                                                                                                                                                                                                                                                                                                                                                                                                                                                                                                                                                                                                                                                                                                                                                             |
| 7   | (MH "Ankle Joint") OR (MH "Hip Joint") OR (MH "Knee Joint+") OR (MH "Tarsal Joint+") OR (MH "Toe Joint+")<br>"lower extremit*" or "lower limb*" or hip* or thigh* or leg* or knee* or ankle* or foot or feet or toe* or "anterior cruciate                                                                                                                                                                                                                                                                                                                                                                                                                                                                                                                                                                                                                                                                                                           |
| 8   | ligament" or "posterior cruciate ligament" or "medial collateral ligament" or "lateral collateral ligament" or femoracetabular or femur or menisc* or patellofemoral                                                                                                                                                                                                                                                                                                                                                                                                                                                                                                                                                                                                                                                                                                                                                                                 |
| 9   | S7 OR S8                                                                                                                                                                                                                                                                                                                                                                                                                                                                                                                                                                                                                                                                                                                                                                                                                                                                                                                                             |
| 10  | ("Medial Collateral Ligament Sprain") OR (MH "Ankle Sprain, Syndesmosis") OR (MH "Calf Strain") OR (MH "Ankle Sprain+") OR (MH "Leg Injuries+") OR (MH "Anterior Cruciate Ligament Injuries") OR (MH "Posterior Cruciate Ligament Injuries")                                                                                                                                                                                                                                                                                                                                                                                                                                                                                                                                                                                                                                                                                                         |
| 11  | (MH "Hip Dislocation") OR (MH "Knee Dislocation+") OR (MH "Ankle Dislocation")                                                                                                                                                                                                                                                                                                                                                                                                                                                                                                                                                                                                                                                                                                                                                                                                                                                                       |
| 12  | S6 AND S9                                                                                                                                                                                                                                                                                                                                                                                                                                                                                                                                                                                                                                                                                                                                                                                                                                                                                                                                            |
| 13  | S10 OR S11 OR S12                                                                                                                                                                                                                                                                                                                                                                                                                                                                                                                                                                                                                                                                                                                                                                                                                                                                                                                                    |
| 14  | (MH "Adaptation, Psychological+") OR (MH "Behavior+") OR (MH "Emotions+") OR (MH "Motivation+") OR (MH "Personal Values") OR (MH "Personality+") OR (MH "Psychology, Social+                                                                                                                                                                                                                                                                                                                                                                                                                                                                                                                                                                                                                                                                                                                                                                         |
| 15  | (MH "Psychology, Sports")                                                                                                                                                                                                                                                                                                                                                                                                                                                                                                                                                                                                                                                                                                                                                                                                                                                                                                                            |
| 16  | psycholog* OR psychosocial OR "psycholog* response*" OR "psycholog* adaptation" or "psycholog* readiness" or "social support"<br>cognition* or affect or behav* or motiv* or emotion* or "patient belief*" or confiden* or attitude* or personalit* or "self esteem" or "locus of control" or "self efficacy" or autonomy or kinesiophob* or "fear* of reinjur*" or avoidance or anxiet* or frustrat* or coping or cope or stress* or optimism or "quality of life" or "patient satisfaction" or "goal setting" or goal* or expectation* or perception* or "patient prefer*" or "athlet* identit*" or wellbeing or mindfulness or resilienc* or catastrophi* or accept* or compassion* or hope or achiev* or education or knowledge or relationship* or interaction* or alliance* or feedback or encourag* or trust or communicat* or rapport or respect or caring or connection or "socioeconomic status" or cultural or ethnicity or "urban rural" |
| 17  |                                                                                                                                                                                                                                                                                                                                                                                                                                                                                                                                                                                                                                                                                                                                                                                                                                                                                                                                                      |
| 18  | S14 OR S15 OR S16 OR S17                                                                                                                                                                                                                                                                                                                                                                                                                                                                                                                                                                                                                                                                                                                                                                                                                                                                                                                             |
| 19  | S3 AND S13 AND S18                                                                                                                                                                                                                                                                                                                                                                                                                                                                                                                                                                                                                                                                                                                                                                                                                                                                                                                                   |
| 20  | Limiters - English Language                                                                                                                                                                                                                                                                                                                                                                                                                                                                                                                                                                                                                                                                                                                                                                                                                                                                                                                          |

---

**d) Search Strategy for SportDiscus**

Database: SPORTDiscus<sup>®</sup> Plus with Full Text  
 Search mode: Boolean/Phrase

Date Searched: May 28, 2018  
 Limits: English Language  
 Results: 971, After duplicates removed: 500

## Search Strategy for SPORTDiscus

| No. | Searches                                                                                                                                                                                                                                                                                                                                                                                                                                                                                                                                                                                                                                                                                                                                                                                                          |
|-----|-------------------------------------------------------------------------------------------------------------------------------------------------------------------------------------------------------------------------------------------------------------------------------------------------------------------------------------------------------------------------------------------------------------------------------------------------------------------------------------------------------------------------------------------------------------------------------------------------------------------------------------------------------------------------------------------------------------------------------------------------------------------------------------------------------------------|
| 1   | Athlet* injur*" OR "sport* injur*" or "recreation* injur*"                                                                                                                                                                                                                                                                                                                                                                                                                                                                                                                                                                                                                                                                                                                                                        |
| 2   | DE "SPORTS injuries"                                                                                                                                                                                                                                                                                                                                                                                                                                                                                                                                                                                                                                                                                                                                                                                              |
| 3   | S1 OR S2                                                                                                                                                                                                                                                                                                                                                                                                                                                                                                                                                                                                                                                                                                                                                                                                          |
| 4   | DE "DISLOCATIONS (Anatomy)" OR DE "RUPTURE of organs, tissues, etc." OR DE "SOFT tissue injuries" OR DE "STRAIN (Physiology)"                                                                                                                                                                                                                                                                                                                                                                                                                                                                                                                                                                                                                                                                                     |
| 5   | tear* or rupture* or ligament* or sprain* or strain* or dislocation*                                                                                                                                                                                                                                                                                                                                                                                                                                                                                                                                                                                                                                                                                                                                              |
| 6   | S4 OR S5                                                                                                                                                                                                                                                                                                                                                                                                                                                                                                                                                                                                                                                                                                                                                                                                          |
| 7   | DE "ANKLE" OR DE "HIP joint" OR DE "KNEE" OR DE "PATELLOFEMORAL joint" OR DE "TARSAL joint" OR DE "TOE joint"                                                                                                                                                                                                                                                                                                                                                                                                                                                                                                                                                                                                                                                                                                     |
| 8   | "lower extremit*" or "lower limb*" or hip* or thigh* or leg* or knee* or ankle* or foot or feet or toe* or "anterior cruciate ligament" or "posterior cruciate ligament" or "medial collateral ligament" or "lateral collateral ligament" or femoracetabular or femur or menisc* or patellofemoral                                                                                                                                                                                                                                                                                                                                                                                                                                                                                                                |
| 9   | S7 OR S8                                                                                                                                                                                                                                                                                                                                                                                                                                                                                                                                                                                                                                                                                                                                                                                                          |
| 10  | DE "ANTERIOR cruciate ligament injuries" OR DE "POSTERIOR cruciate ligament injuries" OR DE "COLLATERAL ligament injuries"                                                                                                                                                                                                                                                                                                                                                                                                                                                                                                                                                                                                                                                                                        |
| 11  | DE "HIP joint injuries" OR DE "KNEE injuries" OR DE "PATELLOFEMORAL joint injuries" OR DE "ANKLE injuries"                                                                                                                                                                                                                                                                                                                                                                                                                                                                                                                                                                                                                                                                                                        |
| 12  | S6 AND S9                                                                                                                                                                                                                                                                                                                                                                                                                                                                                                                                                                                                                                                                                                                                                                                                         |
| 13  | S10 OR S11 OR S12                                                                                                                                                                                                                                                                                                                                                                                                                                                                                                                                                                                                                                                                                                                                                                                                 |
| 14  | DE "PSYCHOLOGY of athletes" OR DE "ATHLETIC identity (Psychology)"                                                                                                                                                                                                                                                                                                                                                                                                                                                                                                                                                                                                                                                                                                                                                |
| 15  | DE "SPORTS psychology" OR DE "MOTIVATION (Psychology)"                                                                                                                                                                                                                                                                                                                                                                                                                                                                                                                                                                                                                                                                                                                                                            |
| 16  | DE "ATHLETIC ability -- Psychological aspects"                                                                                                                                                                                                                                                                                                                                                                                                                                                                                                                                                                                                                                                                                                                                                                    |
| 17  | psycholog* OR psychosocial OR "psycholog* response*" OR "psycholog* adaptation" or "psycholog* readiness" or "social support"                                                                                                                                                                                                                                                                                                                                                                                                                                                                                                                                                                                                                                                                                     |
| 18  | cognition* or affect or behav* or motiv* or emotion* or "patient belief*" or confiden* or attitude* or personalit* or "self esteem" or "locus of control" or "self efficacy" or autonomy or kinesiphob* or "fear* of reinjur*" or avoidance or anxiet* or frustrat* or coping or cope or stress* or optimism or "quality of life" or "patient satisfaction" or "goal setting" or goal* or expectation* or perception* or "patient prefer*" or "athlet* identit*" or wellbeing or mindfulness or resilienc* or catastroph* or accept* or compassion* or hope or achiev* or education or knowledge or relationship* or interaction* or alliance* or feedback or encourag* or trust or communicat* or rapport or respect or caring or connection or "socioeconomic status" or cultural or ethnicity or "urban rural" |
| 19  | S14 OR S15 OR S16 OR S17 OR S18                                                                                                                                                                                                                                                                                                                                                                                                                                                                                                                                                                                                                                                                                                                                                                                   |
| 20  | S3 AND S13 AND S19                                                                                                                                                                                                                                                                                                                                                                                                                                                                                                                                                                                                                                                                                                                                                                                                |
| 21  | Limiters - English Language                                                                                                                                                                                                                                                                                                                                                                                                                                                                                                                                                                                                                                                                                                                                                                                       |

**e) Scopus**

Database: Scopus

Date Searched: May 28, 2018  
 Limits: English Language

Results: 1826, After duplicates removed: 488

---

#### Search Strategy for Scopus

( TITLE-ABS-KEY ( "athlet\* injur\*" OR "sport\* injur\* or recreation\* injur\*" )  
 AND TITLE-ABS-KEY ( tear\* OR rupture\* OR ligament\* OR sprain\* OR strain\* OR dislocation\* )  
 AND TITLE-ABS-KEY ( "lower extremit\*" OR "lower limb\*" OR hip\* OR thigh\* OR leg\* OR knee\* OR ankle\* OR foot OR feet OR toe\* OR "anterior cruciate ligament" OR "posterior cruciate ligament" OR "medial collateral ligament" OR "lateral collateral ligament" OR femoracetabular OR femur OR menisc\* OR patellofemoral )  
 AND TITLE-ABS-KEY ( psycholog\* OR psychosocial OR "psycholog\* response\*" OR "psycholog\* adaptation" OR "psycholog\* readiness" OR "social support" OR "cognition\*" OR affect OR behav\* OR motiv\* OR emotion\* OR "patient belief\*" OR confiden\* OR attitude\* OR personalit\* OR "self esteem" OR "locus of control" OR "self efficacy" OR autonomy OR kinesiophob\* OR "fear\* of reinjur\*" OR avoidance OR anxiet\* OR frustrat\* OR coping OR cope OR stress\* OR optimism OR "quality of life" OR "patient satisfaction" OR "goal setting" OR goal\* OR expectation\* OR perception\* OR "patient prefer\*" OR "athlet\* identit\*" OR wellbeing OR mindfulness OR resilienc\* OR catastroph\* OR accept\* OR compassion\* OR hope OR achiev\* OR education OR knowledge OR relationship\* OR interaction\* OR alliance\* OR feedback OR encourag\* OR trust OR communicate\* OR rapport OR respect OR caring OR connection OR "socioeconomic status" OR cultural OR ethnicity OR "urban rural" ) )

---

#### f) ProQuest

Database: ProQuest

Date Searched: May 28, 2018

Limits: English Language

Results: 319, After duplicates removed: 295

---

#### Search Strategy for ProQuest

noft(sport\* injur\* OR athlet\* injur\* OR recreation\* injur\*)  
 AND noft(tear\* OR rupture\* OR ligament\* OR sprain\* OR strain\* OR dislocation\*)  
 AND noft(lower extremit\* OR lower limb\* OR hip\* OR thigh\* OR leg\* OR knee\* OR ankle\* OR foot OR feet OR toe\* OR anterior cruciate ligament OR posterior cruciate ligament OR medial collateral ligament OR lateral collateral ligament OR femoracetabular OR femur OR menisc\* OR patellofemoral)  
 AND noft (sycholog\* OR psychosocial OR psycholog\* response OR psycholog\* adaptation OR psycholog\* readiness OR social support OR cognition\* OR affect OR behav\* OR motiv\* OR emotion\* OR patient belief\* OR confiden\* OR attitude\* OR personalit\* OR self esteem OR locus of control OR self efficacy OR autonomy OR kinesiophob\* OR fear\* of reinjur\* OR avoidance OR anxiet\* OR frustrat\* OR coping OR cope OR stress\* OR optimism OR quality of life OR patient satisfaction OR goal setting OR goal\* OR expectation\* OR perception\* OR patient prefer\* OR athlet\* identit\* OR wellbeing OR mindfulness OR resilienc\* OR catastroph\* OR accept\* OR compassion\* OR hope OR achiev\* OR education OR knowledge OR relationship\* OR interaction\* OR alliance\* OR feedback OR encourag\* OR trust OR communicat\* OR rapport OR respect OR caring OR connection OR socioeconomic status OR cultural OR ethnicity OR urban rural)

---

**SUPPLEMENTARY FILE 2: MIXED METHOD APPRAISAL TOOL****MMAT 2018 Clarifications (to be used in conjunction with tool)****Qualitative studies**

- 1.1. Is the qualitative approach appropriate to answer the research question? (describes the approach and rationale for using that method)
- 1.2. Are the qualitative data collection methods adequate to address the research question? (refers to the process of how they sampled and collected data: sampling method, description of participants, interviewers, methods/data collection, location)
- 1.3. Are the findings adequately derived from the data? (report how data was derived/analyzed (e.g., inductive/deductive approaches, software, consultation, road map of how themes/theory were derived, reflexivity)
- 1.4. Is the interpretation of results sufficiently substantiated by data? (defines data “saturation” or data/theoretical sufficiency)
- 1.5. Is there coherence between qualitative data sources, collection, analysis and interpretation?

**Quantitative randomized controlled trials**

- 2.1. Is randomization appropriately performed? (explains randomization, allocation concealment)
- 2.2. Are the groups comparable at baseline? (sampling procedures, inclusion/exclusion criteria, baseline demographics/characteristics)
- 2.3. Are there complete outcome data? (complete data with appropriate measures and justified tools, power calculation, RCT reports >80% complete data, or <20% drop-out rates)
- 2.4. Are outcome assessors blinded to the intervention provided? (assessors and interventionists, attempt to blind where possible or reports why they could not blind)
- 2.5. Did the participants adhere to the assigned intervention? (reports a measurement tool to assess compliance, reports compliance >60%)

**Quantitative non-randomized controlled trials (cohorts, case-control cross-sectional)**

- 3.1. Are the participants representative of the target population? (sampling procedures, inclusion/exclusion)
- 3.2. Are measurements appropriate regarding both the outcome and intervention (or exposure)? (explanation of appropriate measures and justified tools)
- 3.3. Are there complete outcome data? (at least 80% follow up, power calculation)
- 3.4. Are the confounders accounted for in the design and analysis? (multi-variable analyses)
- 3.5. During the study period, is the intervention administered (or exposure occurred) as intended? (reports adherence to protocol, limited cross-contamination (e.g., unplanned co-interventions), for cross-sectionals automatic NO)

**Quantitative descriptive studies (incidence/prevalence, case series, case study, surveys)**

- 4.1. Is the sampling strategy relevant to address the research question?
- 4.2. Is the sample representative of the target population? (sampling, inclusion/exclusion)
- 4.3. Are the measurements appropriate? (explanation of appropriate measures and justified tools)
- 4.4. Is the risk of nonresponse bias low? (include completion rates, adherence rates)
- 4.5. Is the statistical analysis appropriate to answer the research question? (If no statistical analyses reported, automatic NO)

**Mixed Methods Studies**

- 5.1. Is there an adequate rationale for using a mixed methods design to address the research question?
- 5.2. Are the different components of the study effectively integrated to answer the research question?
- 5.3. Are the outputs of the integration of qualitative and quantitative components adequately interpreted?
- 5.4. Are divergences and inconsistencies between quantitative and qualitative results adequately addressed? (Discuss both divergence for both consistency and inconsistency. Rate Yes if there is no divergence)
- 5.5. Do the different components of the study adhere to the quality criteria of each tradition of the methods involved (Minimum criteria: Give it a 1 if both individual qualitative and quantitative ratings are greater than 4)

**SUPPLEMENTARY FILE 3: MODIFIED OXFORD CENTRE OF EVIDENCE BASED MEDICINE****Table 1. Modified Oxford Centre of Evidenced-based Medicine (2009)**

| Level of evidence | Definition                                                                                                                                                 |
|-------------------|------------------------------------------------------------------------------------------------------------------------------------------------------------|
| 1B                | Individual RCT (with narrow Confidence Interval)<br>Individual inception cohort study with > 80% follow-up<br>Prospective cohort study with good follow-up |
| 2b                | Individual cohort study<br>Low quality RCT; e.g., <80% follow-up, prone to many bias<br>Retrospective cohort study<br>Low quality cohort study             |
| 3b                | Case-Control Study<br>Poor quality cohort studies (limited population, identified control group)                                                           |
| 4                 | Case series<br>Cross-sectional<br>Pilot prospective cohort (no control group)                                                                              |

\*1a, 2a, 3a, 5 level of evidence were not included due to study exclusion/inclusion criteria

## SUPPLEMENTARY FILE 4: DATA EXTRACTION TABLE

| Study Features<br>(author, year,<br>design, country)                                 | Participants<br>(injury type, sport, level,<br>sample size, gender, age*)                                                                                               | Aims of Study                                                                                                                                                                                                                                           | Stage of<br>Recovery** | Non-Physical<br>Domain <sup>§</sup> | Non-Physical<br>Factors<br>Identified               | Non-Physical<br>Outcome<br>Measure***                                                                                                                                                       | Level of<br>Evidence <sup>§§</sup> | MMAT<br>Rating <sup>§§§</sup> |
|--------------------------------------------------------------------------------------|-------------------------------------------------------------------------------------------------------------------------------------------------------------------------|---------------------------------------------------------------------------------------------------------------------------------------------------------------------------------------------------------------------------------------------------------|------------------------|-------------------------------------|-----------------------------------------------------|---------------------------------------------------------------------------------------------------------------------------------------------------------------------------------------------|------------------------------------|-------------------------------|
| <b>Quantitative - Randomized Controlled Trials (n=3)</b>                             |                                                                                                                                                                         |                                                                                                                                                                                                                                                         |                        |                                     |                                                     |                                                                                                                                                                                             |                                    |                               |
| <i>Cupal &amp; Brewer, 2001</i><br><i>Intervention –</i><br><i>RCT</i><br><i>USA</i> | ACL<br>Sport: basketball, alpine skiing,<br>soccer, volleyball, hockey,<br>rodeo<br>Level: competitive, recreation<br>n=30 (Men=16, Women=14)<br>28.2±8.2 (18-50) years | evaluate the effectiveness of an<br>intervention featuring relaxation and<br>imagery on psychological and physical<br>aspects of rehabilitation following ACL<br>reconstructive surgery using both placebo<br>and standard, no-treatment control groups | Rehabilitation         | Psychological                       | Fear                                                | Re-injury Anxiety Scale                                                                                                                                                                     | 2b                                 | 1                             |
| <i>Maddison et al., 2012</i><br><i>Intervention –</i><br><i>RCT</i><br><i>USA</i>    | ACL<br>Sport: not reported<br>Level: not reported<br>n=21 (Men=13, Women=18)<br>34.86±8.84 years                                                                        | evaluate the effectiveness of a guided<br>imagery intervention to improve functional<br>outcomes post-ACL, and explore potential<br>psychological and psychobiological<br>mechanisms                                                                    | Rehabilitation         | Psychological                       | Self-Efficacy                                       | Rehabilitation Self-Efficacy<br>Rehabilitation Self-Imagery                                                                                                                                 | 2b                                 | 2                             |
| <i>Thomee et al., 2010</i><br><i>Intervention –</i><br><i>RCT</i><br><i>Sweden</i>   | ACL<br>Sport: not reported<br>Level: Competitive, recreation<br>n=40 (Men=19, Women=18)<br>30 (16-53) years                                                             | compare the effects of 2 rehabilitation<br>models on patients' knee function 1 year<br>after ACL injury                                                                                                                                                 | Rehabilitation         | Psychological                       | Self-Efficacy                                       | Knee Self-efficacy Scale<br>Multidimensional Health<br>Locus of Control                                                                                                                     | 2b                                 | 0                             |
| <b>Quantitative – Non-Randomized Studies: Cohort Studies (n=23)</b>                  |                                                                                                                                                                         |                                                                                                                                                                                                                                                         |                        |                                     |                                                     |                                                                                                                                                                                             |                                    |                               |
| <i>Mainwaring et al., 2010</i><br><i>Prospective Cohort</i><br><i>Canada</i>         | ACL<br>Sport: not reported<br>Level: competitive<br>n=7 (Men=1, Women=6)<br>21.2±2.94 (17.5-37.0) years                                                                 | examine and compare emotional<br>disturbance and depression following<br>sports concussion and musculoskeletal<br>injury relative to un-injured controls                                                                                                | Acute                  | Psychological                       | Affect                                              | Shortened POMS                                                                                                                                                                              | 3b                                 | 2                             |
| <i>Ardern et al., 2013</i><br><i>Pilot Prospective Cohort</i><br><i>Australia</i>    | ACL<br>Sport: Not reported<br>Level: Not reported<br>n=187 (Men=115, Women=73)<br>27.3±8.7 (15.1-60.1) years                                                            | assess preoperative psychological<br>responses and its association with<br>returning to the preinjury level of sports<br>participation at 12 months after ACL<br>reconstruction                                                                         | RTS                    | Psychological                       | Psychological<br>Readiness<br>Fear<br>Self-Efficacy | ACL-RSI<br>TSK<br>Incredibly Short Profile of<br>Mood States<br>ERAIQ<br>Sport Rehabilitation LOC                                                                                           | 4                                  | 4                             |
| <i>Baranoff et al., 2015</i><br><i>Pilot Prospective Cohort</i>                      | ACL<br>Sport: Australia rules football,<br>netball, basketball<br>Level: Not reported<br>n=44 (Men=27, Women=17)<br>27±9.4 years                                        | assess the roles of catastrophizing and<br>acceptance in relation to depression, pain<br>intensity, and substance use to cope with<br>injury within 2 weeks post-surgery and<br>after 6 months of ACL rehabilitation                                    | Rehabilitation         | Psychological                       | Coping<br>Catastrophizing<br>Pain<br>Identity       | Acceptance & Action<br>Questionnaire<br>Pain Catastrophizing Scale<br>AIMS<br>Depression Anxiety and<br>Stress Scale<br>Brief Coping Orientations to<br>the Problem Experience<br>Inventory | 4                                  | 2                             |



|                                                                                     |                                                                                                                                                 |                                                                                                                                                                                                                                                                                                                                                               |                |               |                                                  |                                                                                            |   |   |
|-------------------------------------------------------------------------------------|-------------------------------------------------------------------------------------------------------------------------------------------------|---------------------------------------------------------------------------------------------------------------------------------------------------------------------------------------------------------------------------------------------------------------------------------------------------------------------------------------------------------------|----------------|---------------|--------------------------------------------------|--------------------------------------------------------------------------------------------|---|---|
| <i>Brewer et al., 2000</i><br><i>Pilot Prospective Cohort</i><br><i>USA</i>         | ACLR<br>Sport: Not reported<br>Level: competitive, recreational<br>n=80 (Men=55, Women=25)<br>27.22±8.17 years                                  | replicate the findings of Laubach et al. (1996) regarding the relationship between causal attributions and sport injury recovery rate and, more importantly, to extend the findings of Laubach et al. regarding the relationship between causal attributions for recovery and adherence to sport injury rehabilitation by using a prospective research design | Rehabilitation | Psychological | Perceptions                                      | Revised Casual Dimension Scale II<br>Sport Injury Rehabilitation Adherence Scale           | 4 | 2 |
| <i>Brewer et al., 2007</i><br><i>Pilot Prospective Cohort</i><br><i>USA</i>         | ACLR<br>Sport: Not reported<br>Level: Not reported<br>n=91 (Men=58, Women=33)<br>29.73±10.24 (14-54) years                                      | examine predictors of daily pain and negative mood over the first 6 weeks of rehabilitation following ACL reconstruction                                                                                                                                                                                                                                      | Acute          | Psychological | Identity<br>Affect                               | AIMS<br>Shortened POMS<br>Life Orientation Test-Revised                                    | 4 | 2 |
| <i>Brewer &amp; Cornelius 2010</i><br><i>Pilot Prospective Cohort</i><br><i>USA</i> | ACLR<br>Sport: soccer, basketball, football, skiing<br>Level: competitive, recreational<br>n=108 (Men=72, Women=36)<br>29.38±9.93 (14-54) years | examine the possibility of self-protective changes in athletic identity (AI) being initiated after the occurrence of a severe injury                                                                                                                                                                                                                          | RTS            | Psychological | Identity                                         | AIMS<br>Self-reported perceived recovery                                                   | 4 | 1 |
| <i>Brewer et al., 2013</i><br><i>Pilot Prospective Cohort</i><br><i>USA</i>         | ACLR<br>Sport: Not reported<br>Level: Not reported<br>n=91 (Men=58, Women=33)<br>29.73±10.24 (14-54) years                                      | identify predictors of adherence to home rehabilitation exercises following ACL reconstruction                                                                                                                                                                                                                                                                | Acute          | Psychological | Affect<br>Identity                               | AIMS<br>Shortened POMS<br>Life Orientation Test-Revised<br>Self-designed adherence measure | 4 | 3 |
| <i>Brewer et al., 2017</i><br><i>Pilot Prospective Cohort</i><br><i>USA</i>         | ACLR<br>Sport: soccer, basketball, football, skiing<br>Level: competitive, recreational<br>n=108 (Men=72, Women=36)<br>29.38±9.93 (14-54) years | examine longitudinally perceived adversarial growth after a single type an anterior cruciate ligament injury using a multidimensional measure of adversarial growth                                                                                                                                                                                           | RTS            | Psychological | Affect<br>Perceptions                            | POMS-B<br>Post Traumatic Growth inventory                                                  | 4 | 2 |
| <i>Chmielewski et al., 2011</i><br><i>Pilot Prospective Cohort</i><br><i>USA</i>    | ACLR<br>Sport: Not reported<br>Level: Not reported<br>n=97 (Men=56, Women=41)<br>Group 1: 22.4±7.1 years<br>Group 2: 27.3±9.0 years             | examine changes in selected psychosocial factors and the association with knee pain and function over 12 weeks in people with ACL reconstruction                                                                                                                                                                                                              | Rehabilitation | Psychological | Fear<br>Catastrophizing<br>Pain<br>Self-Efficacy | TSK-11<br>Pain Catastrophizing Scale<br>Self-efficacy for Rehabilitation Outcome Scale     | 4 | 3 |
| <i>Gignac et al., 2015</i><br><i>Pilot Prospective Cohort</i><br><i>Canada</i>      | ACLR<br>Sport: soccer, basketball, skiing, ultimate frisbee, football, rugby, baseball, softball, volleyball<br>Level: Not reported             | examine perceptions of importance of exercise and fears of reinjury presurgery and at three-year intervals post ACLR                                                                                                                                                                                                                                          | RTS            | Psychological | Fear<br>Perceptions                              | ACL-QOL<br>Exercise Identity Scale                                                         | 4 | 3 |

|                                                                                       |                                                                                                                                                 |                                                                                                                                                                                                                                                                                                                      |                |                         |                                                           |                                                                                                                                            |   |   |
|---------------------------------------------------------------------------------------|-------------------------------------------------------------------------------------------------------------------------------------------------|----------------------------------------------------------------------------------------------------------------------------------------------------------------------------------------------------------------------------------------------------------------------------------------------------------------------|----------------|-------------------------|-----------------------------------------------------------|--------------------------------------------------------------------------------------------------------------------------------------------|---|---|
|                                                                                       | n=121 (Men=77, Women=44)<br>27.6±6.2 (18-40) years                                                                                              |                                                                                                                                                                                                                                                                                                                      |                |                         |                                                           |                                                                                                                                            |   |   |
| <i>Langford et al., 2009</i><br><i>Pilot Prospective Cohort</i><br><i>Australia</i>   | ACL<br>Sport: Not reported<br>Level: competitive, recreational<br>n=87 (Men=55, Women=32)<br>27.48±5.72 (18-40) years                           | determine whether the psychological responses of athletes who had undergone ACL reconstruction surgery change during the rehabilitation period, and whether these psychological responses are related to returning to competitive sport                                                                              | RTS            | Psychological           | Psychological<br>Readiness<br>Affect                      | ACL-RSI<br>ERAQ                                                                                                                            | 4 | 2 |
| <i>Lepley et al., 2018</i><br><i>Pilot Prospective Cohort</i><br><i>USA</i>           | ACL<br>Sport: Not reported<br>Level: Not reported<br>n=20 (Men=9, Women=11)                                                                     | examine the contributions of presurgical levels of quadriceps strength, pain, and activation to self-reported knee function and readiness to return to functional activity collected when individuals with an ACLR returned to unrestricted physical activity                                                        | RTS            | Psychological           | Psychological<br>Readiness<br>Affect                      | ACL-RSI<br>ERAQ                                                                                                                            | 4 | 3 |
| <i>Masten et al., 2014</i><br><i>Pilot Prospective Cohort</i><br><i>Slovenia</i>      | Mixed knee injuries<br>Sport: Not reported<br>Level: professional, competitive<br>n=68 (Men=47, Women=21)<br>23.4 (16-40) years                 | to measure patients' expectations of knee surgery and to develop and test the reliability of patient-derived knee surgery expectations surveys in a large sample of patients undergoing various types of operations on the knee                                                                                      | Rehabilitation | Psychological<br>Social | Affect<br>Coping<br>Identity<br>Beliefs<br>Social support | State Anxiety Questionnaire<br>SIP<br>AIMS<br>Sports Injury Rehabilitation Beliefs Survey<br>Self-designed questionnaire on social support | 4 | 2 |
| <i>Morrey et al., 1999</i><br><i>Pilot Prospective Cohort</i><br><i>USA</i>           | ACL<br>Sport: football, basketball, soccer, volleyball, baseball<br>Level: competitive, recreational<br>n=27 (Men=15, Women=12)<br>24±7.3 years | to determine the emotional and cognitive impact of injury and surgery on physical recovery                                                                                                                                                                                                                           | Rehabilitation | Psychological           | Affect<br>Coping<br>Fear                                  | ERAQ<br>Incredibly Short Profile of Mood States<br>SIP                                                                                     | 4 | 2 |
| <i>Niven et al., 2012</i><br><i>Pilot Prospective Cohort</i><br><i>United Kingdom</i> | ACL<br>Sport: Gaelic rugby, soccer, hockey<br>Level: professional, recreational, competitive<br>n=87 (Men=65, Women=22)<br>28.95±7.7 years      | to consider changes in adherence behavior over an 8-week period in athletes who have had ACL reconstructive surgery and to investigate the value of the TPB in explaining intention to adhere and actual rehabilitation adherence behavior, and to consider the role of age, sport and performance level on behavior | Acute          | Psychological<br>Social | Perceptions<br>Self-Efficacy<br>Social support            | Self-developed Attitudes Towards ACL Rehabilitation Questionnaire<br>Self-reported diary on adherence                                      | 4 | 1 |
| <i>Paterno et al., 2018</i><br><i>Pilot Prospective Cohort</i><br><i>USA</i>          | ACL<br>Sport: Not reported<br>Level: Not reported<br>n=40 (gender not reported)<br>16.2±3.4 years                                               | to determine whether self-reported fear at time of RTS was related to activity level at time of RTS, objective clinical measures of function at time of RTS, and incidence of second ACL injury within the first 24 months after RTS                                                                                 | RTS            | Psychological           | Fear                                                      | TSK-11                                                                                                                                     | 4 | 2 |
| <i>Roessler et al., 2015</i><br><i>Pilot Prospective Cohort</i><br><i>Denmark</i>     | ACL<br>Sport: soccer, alpine skiing, floor hockey, other<br>Level: competitive, recreational                                                    | to assess the significance of psychological motives for sports participation as predictors of: (a) levels of pain; (b) symptoms; (c) function; (d) quality of life;                                                                                                                                                  | RTS            | Psychological           | Motivation                                                | Self-designed motives survey<br>SF-36                                                                                                      | 4 | 3 |

|                                                                                               |                                                                                                                                                                                              |                                                                                                                                                                                                                                                  |                |                          |                                  |                                                                          |   |   |
|-----------------------------------------------------------------------------------------------|----------------------------------------------------------------------------------------------------------------------------------------------------------------------------------------------|--------------------------------------------------------------------------------------------------------------------------------------------------------------------------------------------------------------------------------------------------|----------------|--------------------------|----------------------------------|--------------------------------------------------------------------------|---|---|
|                                                                                               | n=121 (Men=89, Women=32)<br>26.03±4.92 years                                                                                                                                                 | and (e) overall mental well-being measured using the Knee Injury and Osteoarthritis Outcome Score (KOOS) and the SF-36 Mental Component Score (MCS) 2 years after the knee injury                                                                |                |                          |                                  |                                                                          |   |   |
| Rosenberger et al., 2005<br>Pilot Prospective Cohort<br>USA                                   | Mixed knee injuries<br>Sport: Not reported<br>Level: Not reported<br>n=98 (Men=52, Women=46)<br>ACL group= 31.9 years<br>Meniscectomy group = 44.8 years                                     | to compare preoperative predictions and subsequent postoperative outcomes as rated by physicians and patients in 2 commonly performed elective operative procedures: arthroscopic meniscectomy and ACL reconstruction                            | Acute          | Psychological            | Recovery Expectations            | Self-rating of expected recovery for pain and function                   | 4 | 1 |
| Scherzer et al., 2001<br>Pilot Prospective Cohort<br>USA                                      | ACL<br>Sport: Not reported<br>Level: competitive, recreation<br>n=54 (Men=37, Women=17)<br>28.0±8.33 years                                                                                   | to examine the relationship between self-reported use of psychological skills and adherence to a sport-injury rehabilitation regimen                                                                                                             | Rehabilitation | Psychological Contextual | Coping Environment               | Sports Injury Survey<br>Sport Injury Rehabilitation Adherence Scale      | 4 | 1 |
| Shapiro et al., 2017<br>Pilot Prospective Cohort<br>USA                                       | ACL<br>Sport: Not reported<br>Level: Not reported<br>n=73 (gender not reported)<br>14-54 years                                                                                               | to examine patterns of emotional response to ACL reconstruction surgery for people with low levels of negative mood before surgery                                                                                                               | Acute          | Psychological            | Affect                           | Shortened POMS-B                                                         | 4 | 1 |
| Sonesson et al., 2016<br>Pilot Prospective Cohort<br>Sweden                                   | ACL<br>Sport: football, handball, floorball, motocross, alpine skiing<br>Level: professional, recreational, competitive<br>n=65 (Men=34, Women=31)<br>Median 22 (15-45) years                | to describe individuals' expectations, motivation, and satisfaction before, during and after rehabilitation for ACL reconstruction and to explore how these factors were associated with return to pre-injury sport activity at 1-year follow-up | RTS            | Psychological            | Motivation Recovery Expectations | Self-designed questionnaire on expectations, motivation and satisfaction | 4 | 1 |
| Thomee et al., 2007<br>Pilot Prospective Cohort<br>Sweden                                     | ACL/ACL<br>Sport: Not reported<br>Level: professional, recreational, competitive<br>n=63 (Men=35, Women=28)<br>ACL deficient group : 32.9 (17-54) years<br>Surgery group: 29.2 (17-55) years | to describe the patients' perceived self-efficacy at various times post injury and surgery respectively for responsiveness of the K-SES and to correlate the K-SES score with the patients' subjective symptoms                                  | Rehabilitation | Psychological            | Self-Efficacy                    | KSES                                                                     | 4 | 2 |
| Thomee et al., 2008<br>Pilot Prospective Cohort<br>Sweden                                     | ACL<br>Sport: Not reported<br>Level: professional, recreational, competitive<br>n=38 (Men=25, Women=13)<br>29.7 (16-55) years                                                                | to explore the potential for pre-operative self-efficacy of knee function measured by the K-SES to predict patient outcome in terms of physical activity, knee symptoms and muscle function 1 year after an ACL reconstruction                   | RTS            | Psychological            | Self-Efficacy                    | KSES                                                                     | 4 | 2 |
| <b>Quantitative – Non-Randomized Studies: Case Control/Retrospective Cohort Studies (n=3)</b> |                                                                                                                                                                                              |                                                                                                                                                                                                                                                  |                |                          |                                  |                                                                          |   |   |

|                                                                              |                                                                                                                                                                                  |                                                                                                                                                                                                                                                                            |       |                         |                                                                          |                                                                                                |    |   |
|------------------------------------------------------------------------------|----------------------------------------------------------------------------------------------------------------------------------------------------------------------------------|----------------------------------------------------------------------------------------------------------------------------------------------------------------------------------------------------------------------------------------------------------------------------|-------|-------------------------|--------------------------------------------------------------------------|------------------------------------------------------------------------------------------------|----|---|
| Lentz et al., 2014<br>Case control<br>USA                                    | ACLR<br>Sport: not reported<br>Level: competitive<br>n=73 (Men=45, Women=28)<br>23.2±9.7 years                                                                                   | to compare physical impairment, functional, and psychosocial measures during the return-to-sport stage after ACL reconstruction among 3 return-to-sport subgroups                                                                                                          | RTS   | Psychological           | Fear                                                                     | TSK-11                                                                                         | 3b | 3 |
| Nwachukwu et al., 2017<br>Case Control<br>USA                                | ACLR<br>Sport: basketball, football, lacrosse, skiing, soccer, tennis<br>Level: competitive<br>n=232 (Men=119, Women=112)<br>26.7±12.5 years                                     | to investigate the role of preoperative patient-reported outcome scores for predicting the MCID and RTP after ACLR                                                                                                                                                         | RTS   | Psychological           | Psychological Readiness                                                  | Self-designed questionnaire on RTP SF-12                                                       | 3b | 2 |
| McAllister et al., 2003<br>Retrospective Cohort<br>USA                       | ACLR/ACL<br>Sport: Not reported<br>Level: Not reported<br>n=66 (gender not reported)<br>Age: Not reported                                                                        | evaluated knee function and quality of life at a minimum of 2 years' follow-up in a group of elite collegiate athletes who had sustained an ACL injury                                                                                                                     | RTS   | Psychological           | Perceptions                                                              | Self-designed questionnaire on perceptions of performance SF-36                                | 3b | 1 |
| <b>Quantitative – Non-Randomized Studies: Cross-Sectional Studies (n=21)</b> |                                                                                                                                                                                  |                                                                                                                                                                                                                                                                            |       |                         |                                                                          |                                                                                                |    |   |
| Ardern et al., 2012<br>Cross-sectional<br>Australia                          | ACLR<br>Sport: Australian football, netball, soccer, basketball<br>Level: Not reported<br>n=209 (Men=121, Women=88)<br>31.7±9.7 years                                            | to examine whether athletes who had returned to regular sport participation following anterior cruciate ligament reconstruction surgery still feared re-injury                                                                                                             | RTS   | Psychological           | Fear                                                                     | Self-designed questionnaire on fear ACL-QOL                                                    | 4  | 2 |
| Ardern et al., 2014<br>Cross-sectional<br>Australia                          | ACLR<br>Sport: football, floorball, handball, martial arts, basketball, hockey<br>Level: professional, recreational, competitive<br>n=164 (Men=99, Women=65)<br>26 (18-45) years | to examine whether psychological, appraisal of knee function, and demographic factors were related to returning to the pre-injury sport and recreational activity after ACL reconstruction                                                                                 | RTS   | Psychological           | Psychological Readiness<br>Fear<br>Self-Efficacy<br>Motivation<br>Affect | ACL-RSI<br>TSK<br>KSES<br>Multidimensional Health<br>Locus of Control<br>ACL-QOL               | 4  | 4 |
| Bennell et al., 2016<br>Cross-sectional<br>Australia                         | ACLR/ACL<br>Sport: not reported<br>Level: professional, recreational, competitive<br>n=233 (Men=163, Women=70)<br>32.1±8.5 years                                                 | to describe their general knowledge of knee OA, beliefs about their risk of developing knee OA, and history of health professional advice, including any recommended treatments aiming to reduce OA risks after ACL injury                                                 | RTS   | Psychological<br>Social | Beliefs<br>Social support                                                | Self-designed survey about beliefs, knowledge, education received                              | 4  | 1 |
| Brewer et al., 2002<br>Cross-sectional<br>USA                                | ACLR<br>Sport: Not reported<br>Level: competitive, recreational<br>n=72 (Men=50, Women=22)<br>26.27±7.94 years                                                                   | to examine the extent to which orthopedic surgery experience, general psychological distress, and two personal factors (i.e., age and gender) were related to surgery-specific anxiety prior to ACLR<br>examine the concerns and anticipated benefits associated with ACLR | Acute | Psychological<br>Social | Affect<br>Social support<br>Recovery<br>Expectations                     | Surgery-Specific Anxiety Scale<br>Self-designed questionnaire on concerns and benefits of ACLR | 4  | 2 |

|                                                    |                                                                                                                                                                                           |                                                                                                                                                                                                           |                |                                       |                                                                                 |                                                                                                                                                                             |   |   |
|----------------------------------------------------|-------------------------------------------------------------------------------------------------------------------------------------------------------------------------------------------|-----------------------------------------------------------------------------------------------------------------------------------------------------------------------------------------------------------|----------------|---------------------------------------|---------------------------------------------------------------------------------|-----------------------------------------------------------------------------------------------------------------------------------------------------------------------------|---|---|
| Brewer et al., 2003<br>Cross-sectional<br>USA      | ACLR<br>Sport: not reported<br>Level: competitive, recreational<br>n=61 (Men=40, Women=21)<br>26.03±7.99 (14-47) years                                                                    | to investigate whether prospective associations among psychological factors and rehabilitation adherence differ as a function of age through reanalysis of data from a previously published report        | Acute          | Psychological<br>Social               | Motivation<br>Identity<br>Social support                                        | Self-Motivation Inventory<br>AIMS<br>Brief Symptom Inventory<br>Social Support Inventory<br>Sport Injury Rehabilitation Adherence Scale                                     | 4 | 2 |
| Chan et al., 2009<br>Cross-sectional<br>Hong Kong  | ACLR<br>Sport: soccer, basketball<br>Level: Not reported<br>n=115 (Men=94, Women=21)<br>Men group: 27.05±3.99 years<br>Women group: 23.38±4.01 years                                      | to examine the relationship between patients' perceptions of their physiotherapists' autonomy-supportive behaviors and patients' autonomous motivation on adherence to home-based rehabilitation exercise | Rehabilitation | Psychological<br>Social<br>Contextual | Autonomy<br>Social support<br>Therapeutic Alliance<br>Motivation Environment    | Health Care Climate Questionnaire<br>Treatment Self-Regulation Questionnaire<br>Sport Injury Rehabilitation Adherence Scale<br>Self-reported Adherence Scale                | 4 | 2 |
| Chan et al., 2011<br>Cross-sectional<br>Hong Kong  | ACLR<br>Sport: association football, basketball, volleyball, athletics<br>Level: Not reported<br>n=115 (Men=94, Women=21)<br>Men group: 27.05±3.99 years<br>Women group: 23.38±4.01 years | to examine the effect of sport motivation on treatment motivation (i.e., the trans-contextual process) among recreational sport participants who ruptured their ligaments in sport                        | Rehabilitation | Psychological<br>Social<br>Contextual | Motivation<br>Autonomy<br>Social support<br>Therapeutic Alliance<br>Environment | Behavioral Regulation in Sport Questionnaire<br>Health Care Climate Questionnaire<br>Treatment Self-Regulation Questionnaire<br>Sport Injury Rehabilitation Adherence Scale | 4 | 2 |
| Chmielewski et al., 2008<br>Cross-sectional<br>USA | ACLR<br>Sport: Not reported<br>Level: Not reported<br>n=97 (Men=61, Women=36)<br>Group 1: 26.2±9.2 years<br>Group 2: 25.3±11.0 years<br>Group 3: 24.0±7.7 years                           | to measure fear of movement/reinjury levels and determine the association with self-report of function at different time frames during ACL reconstruction rehabilitation                                  | RTS            | Psychological                         | Fear                                                                            | TSK-11<br>SF-8                                                                                                                                                              | 4 | 4 |
| Feucht et al., 2016<br>Cross-sectional<br>Germany  | ACLR<br>Sport: Not reported<br>Level: professional, recreational, competitive<br>n=181 (Men=125, Women=5)<br>31.2±10.6 years                                                              | to prospectively analyze and to compare patient expectations of primary and revision ACLR (R-ACLR), and to assess associated factors                                                                      | Acute          | Psychological<br>Contextual           | Recovery<br>Expectations<br>Environment                                         | Self-designed survey of recovery expectations                                                                                                                               | 4 | 2 |
| Flanigan et al., 2013<br>Cross-sectional<br>USA    | ACLR<br>Sport: softball, football, rugby, volleyball, soccer, athletics<br>Level: professional, recreational, competitive<br>n=135 (Men=67, Women=68)<br>28.3±10.4 (15-56) years          | to determine patient-cited reasons for lack of return to sport after ACLR                                                                                                                                 | RTS            | Psychological                         | Fear                                                                            | Self-designed survey of RTP status and related Factors                                                                                                                      | 4 | 1 |
| George et al., 2012<br>Cross-sectional<br>USA      | ACLR<br>Sport: Not reported<br>Level: Not reported                                                                                                                                        | to investigate the TSK and PCS to determine if use of shortened versions of these questionnaires is warranted in                                                                                          | Rehabilitation | Psychological                         | Fear<br>Catastrophizing<br>Pain                                                 | TSK-11<br>Pain Catastrophizing Scale                                                                                                                                        | 4 | 2 |

|                                                   |                                                                                                                                                                                                           |                                                                                                                                                                                                                                                                                                                                                                                                              |                |                             |                                         |                                                               |   |   |
|---------------------------------------------------|-----------------------------------------------------------------------------------------------------------------------------------------------------------------------------------------------------------|--------------------------------------------------------------------------------------------------------------------------------------------------------------------------------------------------------------------------------------------------------------------------------------------------------------------------------------------------------------------------------------------------------------|----------------|-----------------------------|-----------------------------------------|---------------------------------------------------------------|---|---|
|                                                   | n=289 (Men=180, Women=109)<br>Early post op group: 25.5±9.9 years<br>Late post op group: 24.6±10.3 years                                                                                                  | patients with ACLR                                                                                                                                                                                                                                                                                                                                                                                           |                |                             |                                         |                                                               |   |   |
| Hart et al., 2015<br>Cross-sectional<br>Australia | ACLR<br>Sport: Not reported<br>Level: not reported<br>n=66 (gender not reported)<br>OA group: 45±11 years<br>No OA group: 39±9 years                                                                      | to compare knee confidence and kinesiophobia between those with and without knee OA after ACLR; secondly, to investigate the relationship between knee confidence and kinesiophobia, knee-related symptoms, and functional impairments in those with knee OA after ACLR                                                                                                                                      | RTS            | Psychological               | Confidence<br>Fear                      | KOOS QOL<br>TSK                                               | 4 | 2 |
| Kvist et al., 2005<br>Cross-sectional<br>Sweden   | ACLR<br>Sport: soccer, handball, ice hockey, floorball, American football<br>Level: Not reported<br>n=62 (Men=34, Women=28)<br>median 27 (18-37) years                                                    | to investigate whether fear of re-injury is a factor of significance for returning to previous level of activity in patients who have undergone ACL reconstruction                                                                                                                                                                                                                                           | RTS            | Psychological               | Fear                                    | TSK                                                           | 4 | 1 |
| Lam et al., 2017<br>Cross-sectional<br>USA        | Mixed knee injuries<br>Sport: baseball, basketball, soccer<br>Level: competitive<br>n=87 (Men=39, Women=48)<br>Mild Group: (M 19.3±1.7; F 19.4±1.2) years<br>Severe Group: (M 20.0±2.1; F 18.8±1.1) years | to determine whether knee-specific function, as measured by the IKDC and HRQOL differs in collegiate athletes based on the severity of a previous knee injury                                                                                                                                                                                                                                                | Rehabilitation | Psychological               | Affect                                  | SF-12                                                         | 4 | 2 |
| Lentz et al., 2012<br>Cross-sectional<br>USA      | ACLR<br>Sport: Not reported<br>Level: competitive<br>n=94 (Men=60, Women=34)<br>22.4± 8.6 years                                                                                                           | to examine differences in clinical variables between those who return to preinjury level of sports participation and those who do not at 1 year following ACL reconstruction and to determine the factors most strongly associated with return-to-sport status in a multivariate model, and to explore the discriminatory value of clinical variables associated with return to sport at 1-year post surgery | RTS            | Psychological               | Fear                                    | TSK-11                                                        | 4 | 3 |
| Mancuso et al., 2001<br>Cross-sectional<br>USA    | Mixed knee injuries<br>Sport: Not reported<br>Level: Not reported<br>n=216 (gender not reported)<br>Age not reported                                                                                      | to measure patients' expectations of knee surgery and to develop and test the reliability of patient-derived knee surgery expectations surveys in a large sample of patients undergoing various types of operations on the knee                                                                                                                                                                              | Acute          | Psychological<br>Contextual | Recovery<br>Expectations<br>Environment | Self-designed survey on recovery expectations and environment | 4 | 2 |

|                                                                        |                                                                                                                                                                                                  |                                                                                                                                                                                                                                           |                |                         |                                                                  |                                                                                                                                                                       |   |   |
|------------------------------------------------------------------------|--------------------------------------------------------------------------------------------------------------------------------------------------------------------------------------------------|-------------------------------------------------------------------------------------------------------------------------------------------------------------------------------------------------------------------------------------------|----------------|-------------------------|------------------------------------------------------------------|-----------------------------------------------------------------------------------------------------------------------------------------------------------------------|---|---|
| McGuine et al., 2012<br>Pilot Prospective Cohort<br>USA                | Mixed knee injuries<br>Sport: soccer, basketball, running, track and field, volleyball, softball, cheer/dance, snow skiing<br>Level: Not reported<br>n=255 (Men=0, Women=255)<br>17.4±2.4 years  | to document the changes in knee function and self-reported HRQOL in a cohort of women athletes who have sustained a knee injury                                                                                                           | Rehabilitation | Psychological           | Affect                                                           | SF-12                                                                                                                                                                 | 4 | 2 |
| Thomee et al., 2007<br>Cross-sectional<br>Sweden                       | ACL/ACL<br>Sport: Not reported<br>Level: recreational<br>n=116 (Men=70, Women=46)<br>31.3±8.9 (18-55) years                                                                                      | to explore physical and psychological measures believed to determine patients perceived self-efficacy in the rehabilitation of patients with an ACL injury                                                                                | RTS            | Psychological           | Self-Efficacy<br>Coping                                          | KSES<br>Coping Strategies<br>Questionnaires<br>SF-36<br>Multidimensional Health<br>Locus of Control                                                                   | 4 | 4 |
| Tripp et al., 2011<br>Cross-sectional<br>USA                           | ACL<br>Sport: soccer, basketball, hockey, skiing, baseball, squash, rugby, karate, volleyball, football<br>Level: competitive, recreation<br>n=49 (Men=27, Women=22)<br>29.15±11.5 (16-53) years | to develop exploratory regression models for confidence in returning to sport and return to sport in athletes at 1 year after ACL reconstruction                                                                                          | RTS            | Psychological           | Fear<br>Affect<br>Confidence<br>Catastrophizing<br>Pain          | TSK<br>Shortened POMS<br>Pain Catastrophizing Scale<br>Sport Self-Confidence<br>inventory                                                                             | 4 | 1 |
| Udry et al., 2003<br>Cross-sectional<br>USA                            | ACL<br>Sport: Not reported<br>Level: not reported<br>n=121 (Men=78, Women=43)<br>21.6±8.0 (15-48) years                                                                                          | to describe the mood-disturbance levels and psychological readiness levels of preoperative ACL patients and examine differences between adolescent and adult sports medicine patients relative to psychological readiness for ACL surgery | Acute          | Psychological           | Psychological<br>Readiness<br>Self-Efficacy<br>Affect<br>Beliefs | Processes of Change to<br>Injury Rehabilitation<br>Questionnaire<br>Self-Efficacy Injury<br>Rehabilitation<br>Shortened POMS-B<br>Decisional Balance<br>Questionnaire | 4 | 1 |
| Webster et al., 2008<br>Cross-sectional<br>Australia                   | ACL<br>Sport: Not reported<br>Level: Not reported<br>n=220 (Men=124, Women=96)<br>29.2±9.7 (16-54) years                                                                                         | to develop a scale which measured athletes' emotions, confidence and risk appraisal when returning to sport after ACL reconstruction surgery                                                                                              | RTS            | Psychological           | Psychological<br>Readiness                                       | ACL-RSI                                                                                                                                                               | 4 | 2 |
| <b>Quantitative – Descriptive Studies: Case Series (n=4)</b>           |                                                                                                                                                                                                  |                                                                                                                                                                                                                                           |                |                         |                                                                  |                                                                                                                                                                       |   |   |
| Ardern et al., 2015<br>Case Series<br>Australia                        | ACL<br>Sport: Australian football, netball, soccer, basketball<br>Level: competitive, recreational<br>n=122 (Men=76, Women=46)<br>28.3±8.4 (15.1-60.1) years                                     | to investigate the sports participation outcomes of a group of athletes who had not returned to their preinjury level sport at 1 year after ACL reconstruction                                                                            | RTS            | Psychological           | Psychological<br>Readiness<br>Fear<br>Affect                     | ACL-RSI<br>TSK<br>ERAIQ<br>Incredibly Short Profile of<br>Mood States                                                                                                 | 4 | 4 |
| Mankad et al., 2009<br>Case Study – Pilot<br>Intervention<br>Australia | ACL<br>Sport: football<br>Level: professional<br>n=1 (Men=1, Women=0)<br>26 years                                                                                                                | explore the acceptability and effectiveness of the written emotional disclosure paradigm within the context of professional sport                                                                                                         | Rehabilitation | Psychological<br>Social | Affect<br>Social support                                         | Impact of Event Scale<br>Shortened POMS<br>Rosenberg Self-esteem Scale                                                                                                | 4 | 2 |

|                                                                                   |                                                                                                                                                                      |                                                                                                                                                                                                                                                                                                                                                            |                |                                       |                                                                         |                                                                                                                                              |     |   |
|-----------------------------------------------------------------------------------|----------------------------------------------------------------------------------------------------------------------------------------------------------------------|------------------------------------------------------------------------------------------------------------------------------------------------------------------------------------------------------------------------------------------------------------------------------------------------------------------------------------------------------------|----------------|---------------------------------------|-------------------------------------------------------------------------|----------------------------------------------------------------------------------------------------------------------------------------------|-----|---|
| <i>Samuel et al., 2015</i><br><i>Case Series</i><br><i>Israel</i>                 | ACLR<br>Sport: basketball, judo, track and field, gymnastics<br>Level: Professional<br>n=6 (gender not reported)<br>Age not reported                                 | to examine competitive athletes' experiences of severe injuries                                                                                                                                                                                                                                                                                            | Rehabilitation | Psychological<br>Social<br>Contextual | Coping<br>Perceptions<br>Motivation<br>Social support<br>Environment    | Change-Event Inventory<br>Brief Coping Orientations to the Problem Experience<br>Inventory<br>AIMS                                           | 4   | 3 |
| <i>Tagesson &amp; Kvist, 2016</i><br><i>Case Series</i><br><i>Sweden</i>          | ACLR<br>Sport: Not reported<br>Level: competitive, recreation<br>n=19 (Men=11, Women=8)<br>Re-injury group: 21 (17-25) years<br>No re-injury group: 21 (16-31) years | to compare fear of re-injury, patient reported knee function and static and dynamic tibial translation assessed before and 5 weeks after the ACL reconstruction, and muscle strength assessed before the ACL reconstruction, between the individuals who sustained a new knee injury, and those with intact ACL reconstruction (i.e. no subsequent injury) | RTS            | Psychological                         | Fear<br>Confidence                                                      | TSK<br>Modified KOOS and ACL-QOL                                                                                                             | 4   | 4 |
| <b>Mixed Methods Studies (n=5)</b>                                                |                                                                                                                                                                      |                                                                                                                                                                                                                                                                                                                                                            |                |                                       |                                                                         |                                                                                                                                              |     |   |
| <i>Carson &amp; Polman, 2008</i><br><i>Mixed Methods</i><br><i>United Kingdom</i> | ACLR<br>Sport: Rugby<br>Level: Professional<br>n=1 (Men=1, Women=0)<br>Age not reported                                                                              | to provide a more holistic view of cognitive appraisal related to serious sports injury                                                                                                                                                                                                                                                                    | Rehabilitation | Psychological<br>Social               | Affect<br>Coping<br>Self-efficacy<br>Autonomy<br>Fear<br>Social support | ERAIQ<br>SIP<br>Coping with Health, Injuries, and Problems Inventory<br>Social Support Survey<br>Semi-structured Interviews                  | N/A | 3 |
| <i>Carson &amp; Polman, 2010</i><br><i>Mixed Methods</i><br><i>United Kingdom</i> | ACLR<br>Sport: Rugby<br>Level: Professional<br>n=4 (Men=4, Women=0)<br>18-27 years                                                                                   | to investigate longitudinally the possible benefits of avoidance coping during rehabilitation from an ACL injury                                                                                                                                                                                                                                           | Rehabilitation | Psychological<br>Social               | Coping<br>Social support                                                | Self-Reported Diary<br>Coping with Health, Injuries, and Problems Inventory<br>Semi-Structured Interviews                                    | N/A | 2 |
| <i>Rock &amp; Jones, 2002</i><br><i>Mixed Methods</i><br><i>USA</i>               | ACLR<br>Sport: badminton, football<br>Level: competitive<br>n=3 (Men=2, Women=1)<br>median 35 (31-40) years                                                          | to explore the impact of counselling skills interventions on the experiences of participants undergoing rehabilitation from ACL-reconstruction surgery                                                                                                                                                                                                     | Rehabilitation | Psychological<br>Social               | Motivation<br>Coping<br>Social support<br>Recovery expectations         | ERAIQ<br>Social Support Behaviors Survey<br>Sport Injury Rehabilitation Adherence Scale<br>Self-Reported Diary<br>Semi-structured Interviews | N/A | 2 |
| <i>Ross et al., 2017</i><br><i>Mixed Methods</i><br><i>South Africa</i>           | ACLR<br>Sport: skiing, netball, motocross, rugby, soccer, hockey<br>Level: professional, recreational, competitive<br>n=12 (Men=10, Women=2)<br>33.9 (19-45) years   | to explore factors influencing or informing athletes' experience of fear of reinjury post ACL reconstruction, albeit normal knee function                                                                                                                                                                                                                  | RTS            | Psychological                         | Fear                                                                    | Self-designed questionnaire on fear<br>Semi-structured Interviews                                                                            | N/A | 2 |



|                                                                                            |                                                                                                                                                                            |                                                                                                                                                                                                                          |                |                                       |                                                                                          |                                                                         |     |   |
|--------------------------------------------------------------------------------------------|----------------------------------------------------------------------------------------------------------------------------------------------------------------------------|--------------------------------------------------------------------------------------------------------------------------------------------------------------------------------------------------------------------------|----------------|---------------------------------------|------------------------------------------------------------------------------------------|-------------------------------------------------------------------------|-----|---|
| <i>Tjong et al., 2014</i><br><i>Mixed Methods</i><br><i>Canada</i>                         | ACLR<br>Sport: soccer, football, ultimate frisbee, basketball, other<br>Level: professional, recreational, competitive<br>n=31 (Men=22, Women=9)<br>18-40 years            | to understand the factors affecting the cessation of sport participation after ACL reconstruction                                                                                                                        | RTS            | Psychological<br>Social<br>Contextual | Fear<br>Perceptions<br>Identity<br>Confidence<br>Social support<br>Environment           | Self-designed questionnaire on RTS status<br>Semi-structured interviews | N/A | 1 |
| <b>Qualitative Studies (n=18)</b>                                                          |                                                                                                                                                                            |                                                                                                                                                                                                                          |                |                                       |                                                                                          |                                                                         |     |   |
| <i>Carson &amp; Polman, 2012</i><br><i>Qualitative – Case Study</i><br><i>Australia</i>    | ACLR<br>Sport: Rugby<br>Level: Professional<br>n=5 (Men=4, Women=0)<br>Median 24 (18-27) years                                                                             | to investigate the experience of five professional men rugby union players during their return to competition, in order to ascertain the emotional reactions and coping strategies actually utilized during their return | RTS            | Psychological<br>Social<br>Contextual | Coping<br>Affect<br>Fear<br>Confidence<br>Social support<br>Environment                  | Self-Reported Diary<br>Semi-structured Interviews                       | N/A | 4 |
| <i>Evans &amp; Hardy, 2002</i><br><i>Qualitative – Case Study</i><br><i>United Kingdom</i> | ACL<br>Sport: tennis, rugby football, soccer, netball<br>Level: not reported<br>n=7 (Men=5, Women=2)<br>27.22±6.96 (19-39) years                                           | a study to expand on the findings from an earlier goal-setting intervention study                                                                                                                                        | Rehabilitation | Psychological<br>Social               | Coping<br>Affect<br>Motivation<br>Social support<br>Therapeutic alliance                 |                                                                         | N/A | 4 |
| <i>Ezzat et al, 2018</i><br><i>Qualitative – Phenomenology</i><br><i>Canada</i>            | Mixed knee injuries<br>Sport: Not reported<br>Level: Not reported<br>n=20 (Men=10, Women=10)<br>median 22.3 (16.5-26.4)                                                    | to understand the influence of the injury experience on current attitudes and beliefs about PA and PTOA 3-10 years after intra-articular knee injury                                                                     | RTS            | Psychological<br>Social               | Beliefs<br>Identity<br>Confidence<br>Fear<br>Perceptions<br>Resiliency<br>Social support |                                                                         | N/A | 4 |
| <i>Filbay et al., 2016</i><br><i>Qualitative – Descriptive</i><br><i>Australia</i>         | ACLR<br>Sport: AFL football, netball, soccer, rugby, skiing, dancing, weight lifting, running, yoga<br>Level: Not reported<br>n=17 (Men=7, Women=10)<br>36±8 (25-50) years | to examine how do people describe their QoL 5-20 years after ACLR and what factors affect QoL                                                                                                                            | RTS            | Psychological                         | Fear                                                                                     |                                                                         | N/A | 4 |
| <i>Ford &amp; Gordon, 1999</i><br><i>Qualitative – Descriptive</i><br><i>Australia</i>     | Mixed knee injuries<br>Sport: Australian football, volleyball, basketball<br>Level: professional, recreational, competitive<br>n=4 (Men=2, Women=2)<br>Age not reported    | to describe athletes' responses to rehabilitation, experience of loss and assistance to facilitate their recovery process                                                                                                | Rehabilitation | Psychological<br>Social               | Identity<br>Coping<br>Social support<br>Therapeutic alliance                             |                                                                         | N/A | 2 |

|                                                                                           |                                                                                                                                                                                             |                                                                                                                                                                                                   |                |                                       |                                                                                                           |     |   |
|-------------------------------------------------------------------------------------------|---------------------------------------------------------------------------------------------------------------------------------------------------------------------------------------------|---------------------------------------------------------------------------------------------------------------------------------------------------------------------------------------------------|----------------|---------------------------------------|-----------------------------------------------------------------------------------------------------------|-----|---|
| <i>Heijne et al., 2008</i><br>Qualitative –<br>Descriptive<br>Sweden                      | ACLR<br>Sport: Not reported<br>Level: competitive<br>n=12 (Men=9, Women=1)<br>Median 29 (23-41) years                                                                                       | to explore and describe patients’<br>experiences of the rehabilitation process<br>after ACL reconstruction                                                                                        | Rehabilitation | Psychological<br>Social<br>Contextual | Coping<br>Affect<br>Social support<br>Recovery<br>expectations<br>Environment                             | N/A | 3 |
| <i>Ivarsson et al., 2016</i><br>Qualitative –<br>Narrative/Case study<br>Sweden           | ACLR<br>Sport: handball<br>Level: professional<br>n=1 (Men=1, Women=0)<br>28 years                                                                                                          | to explore an athlete’s career<br>development, including the impact of<br>injuries, and (b) to explore that athlete’s<br>injury experiences in detail                                             | Rehabilitation | Psychological<br>Social               | Coping<br>identity<br>Fear<br>Social support<br>Shared<br>decision-<br>making<br>Recovery<br>expectations | N/A | 5 |
| <i>Johnson et al., 2016</i><br>Qualitative - Narrative<br>Sweden                          | ACLR<br>Sport: soccer<br>Level: professional<br>n=8 (Men=0, Women=8)<br>28±3.9 (25-35) years                                                                                                | to understand the psychosocial variables<br>that characterize players who express a<br>resilient behavior during rehabilitation<br>after a first-time ACL injury and subsequent<br>reconstruction | Rehabilitation | Psychological<br>Social               | Resilience<br>Social support                                                                              | N/A | 4 |
| <i>Johnston &amp; Carroll, 1998</i><br>Qualitative –<br>Grounded Theory<br>United Kingdom | Mixed knee injuries<br>Sport: badminton, basketball,<br>rugby, running<br>Level: professional,<br>recreational, competitive<br>n=6 (Men=4, Women=2)<br>22.8±10.3 (18-60) years              | to explain athletes’ emotional response to<br>injury as well as their situational and<br>temporal contexts                                                                                        | Acute          | Psychological<br>Social               | Affect<br>Social support<br>Beliefs<br>Fear                                                               | N/A | 4 |
| <i>Mainwaring 1999</i><br>Qualitative –<br>Grounded Theory<br>Canada                      | Mixed knee injuries<br>Sport: down-hill skiing, ice<br>hockey, tennis, squash,<br>basketball, American football<br>Level: professional, competitive<br>n=10 (Men=6, Women=4)<br>20-29 years | to develop a grounded model of<br>psychological reaction after severe knee-<br>related injury                                                                                                     | Rehabilitation | Psychological<br>Social               | Coping<br>Fear<br>Identity<br>Affect<br>Social support<br>Therapeutic<br>alliance                         | N/A | 3 |
| <i>Nordahl et al., 2013</i><br>Qualitative –<br>Descriptive<br>Sweden                     | ACLR<br>Sport: Skiing<br>Level: Professional<br>n=5 (Men=2, Women=3)<br>17.8 (16-19) years                                                                                                  | to explore the experiences of Swedish ski<br>high school students when returning to<br>skiing at the elite level after ACL injury and<br>ACL reconstruction                                       | Rehabilitation | Psychological<br>Social<br>Contextual | Coping<br>Self-efficacy<br>Affect<br>Social support<br>Therapeutic<br>alliance<br>Environment             | N/A | 2 |
| <i>Olofsson et al., 2010</i><br>Qualitative –<br>Grounded Theory<br>Sweden                | ACLR<br>Sport: Not reported<br>Level: competitive, recreation<br>n=7 (Men=4, Women=3)<br>19-57 years                                                                                        | to illuminate ACL-reconstructed athletes’<br>experience of their injury, rehabilitation<br>and recovery                                                                                           | Rehabilitation | Psychological<br>Social               | Coping<br>Fear<br>Social support<br>Shared<br>decision-                                                   | N/A | 3 |

|                                                                                     |                                                                                                                                                                           |                                                                                                                                                                                                                                                                                 |                |                                       |                                                                                                                |     |   |
|-------------------------------------------------------------------------------------|---------------------------------------------------------------------------------------------------------------------------------------------------------------------------|---------------------------------------------------------------------------------------------------------------------------------------------------------------------------------------------------------------------------------------------------------------------------------|----------------|---------------------------------------|----------------------------------------------------------------------------------------------------------------|-----|---|
|                                                                                     |                                                                                                                                                                           |                                                                                                                                                                                                                                                                                 |                |                                       | making<br>Therapeutic<br>alliance<br>Recovery<br>expectations                                                  |     |   |
| <i>Pizzari et al., 2002</i><br><i>Qualitative –<br/>Descriptive<br/>Australia</i>   | ACL<br>Sport: netball, soccer, TKD,<br>basketball, football<br>Level: competitive, recreation<br>n=11 (Men=4, Women=7)<br>21-52 years                                     | to identify variables that influence<br>adherence to rehabilitation after ACL<br>reconstruction                                                                                                                                                                                 | Rehabilitation | Psychological<br>Social<br>Contextual | Motivation<br>Autonomy<br>Fear<br>Social support<br>Therapeutic<br>alliance<br>Environment                     | N/A | 3 |
| <i>Podlog et al., 2006</i><br><i>Qualitative –<br/>Descriptive<br/>Australia</i>    | Mixed knee injuries<br>Sport: netball, athletics,<br>Australian football<br>Level: professional, competitive<br>n=3 (Men=1, Women=2)<br>Median 23 (19-24) years           | to examine competitive athletes'<br>experiences in returning to sport following<br>a serious injury                                                                                                                                                                             | RTS            | Psychological<br>Social               | Fear<br>Affect<br>Social support<br>Recovery<br>expectations                                                   | N/A | 3 |
| <i>Podlog et al., 2013</i><br><i>Qualitative –<br/>Descriptive<br/>Australia</i>    | Mixed knee injuries<br>Sport: basketball, netball,<br>soccer<br>Level: professional, competitive<br>n=4 (Men=1, Women=3)<br>15.3±1.55 (12-17) years                       | to explore adolescent athlete perspectives<br>of their rehabilitation and return to sport<br>experiences                                                                                                                                                                        | RTS            | Psychological<br>Social<br>Contextual | Coping<br>Fear<br>Social support<br>Shared-<br>decision<br>making<br>Sport culture<br>Recovery<br>expectations | N/A | 4 |
| <i>Ronkainen &amp; Ryba, 2017</i><br><i>Qualitative –<br/>Narrative<br/>China</i>   | Mixed knee injuries<br>Sport: hockey<br>Level: professional<br>n=2 (Men=2, Women=0)<br>33 (29-37) years                                                                   | to provide an in-depth analysis of<br>how existential concerns are manifested<br>and articulated in injury narratives                                                                                                                                                           | Rehabilitation | Psychological<br>Social<br>Contextual | Coping<br>Identity<br>Social support<br>Sport culture                                                          | N/A | 4 |
| <i>Scott et al., 2017</i><br><i>Qualitative –<br/>Phenomenology<br/>New Zealand</i> | ACL<br>Sport: rugby, soccer, basketball,<br>netball, martial arts<br>Level: professional,<br>recreational, competitive<br>n=9 (Men=5, Women=4)<br>Median 31 (21-37) years | to explore the perspectives of individuals<br>who had ACL less than 3 years, to gain a<br>deeper understanding of the impact of this<br>injury, surgery and rehabilitation had on<br>their life and describe factors which<br>influenced the perceived QoL since the<br>surgery | Rehabilitation | Psychological<br>Social<br>Contextual | Identity<br>Fear<br>Social support<br>Therapeutic<br>alliance<br>Environment<br>Recovery<br>expectations       | N/A | 3 |
| <i>Thing, 2006</i><br><i>Qualitative –<br/>Phenomenology<br/>Denmark</i>            | ACL/ACL<br>Sport: handball<br>Level: professional, competitive<br>n=17 (Men=0, Women=17)<br>25 (19-33) years                                                              | to investigate how do players interpret<br>their lives and make meaning of what their<br>injury experience                                                                                                                                                                      | Rehabilitation | Psychological<br>Social               | Coping<br>Identity<br>Psychological<br>readiness<br>Social support                                             | N/A | 3 |

\*Age reported as (mean  $\pm$  SD, range) in years unless otherwise specified

\*\*Rehabilitation stage: acute - immediately post-injury or peri-operative phase; rehabilitation – time to restore function back to pre-injury level;

RTS – time where participants were returning back to sport or activity or long-term management

§ Classification into a non-physical domain (i.e. psychological, social, or contextual)

§§ Level of evidence using the Modified Oxford Centre of Evidenced-based Medicine (2009)

§§§ MMAT rating is out of a maximum of 5, with a rating of 5 indicating the highest methodological quality for that study design. Note that MMAT rating should only be used to compare similar study designs and ratings should not be used to compare across different study designs or categories.

\*\*\*Abbreviations listed for commonly reported outcome measures in studies

ACL-RSI = Anterior Cruciate Ligament-Return to Sport Injury Scale

TSK = Tampa Scale of Kinesiophobia

ISP = incredibly short profile of mood states

ERAIQ = Emotional Responses of Athletes to Injury Questionnaire

POMS = Profile of Mood States Scale

KSES = Knee Self-Efficacy Scale

SRLC = sport-related locus of control

ACL-QOL = Anterior cruciate ligament quality of life scale

AIMS = Athletic Identity Measurement Scale

SIP = Sports Inventory for Pain Questionnaire

SF(8/12/36)= Short-Form Health Survey
